# Supplementary material for: Comparative Genomic Analysis Reveals Genetic Mechanisms of the Variety of Pathogenicity, Antibiotic Resistance, and Environmental Adaptation of Providencia Genus
Source: Front Microbiol. 2020 Oct 27;11:572642. doi: 10.3389/fmicb.2020.572642 (PMC7652902; doi:10.3389/fmicb.2020.572642)
Supplement: Supplementary Table 4 — Results of species-specific genes in three Providencia species after KEGG annotation. [file Table_4.XLSX]

## Sheet: KO annatation
Providencia rettgeri		Providencia alcalifaciens		Providencia stuarti
Gene num	KO	Gene num	KO	Gene num	KO
1_598	K01761	8_1472		0_3764
1_597		8_1458		0_3765	K10716
2_928	K18030	8_1967		0_662
2_929	K18030	8_1534	K00027	0_1859
2_927	K18029	8_1471		0_3532	K00574
2_2584	K00048	8_2706		0_2027	K05874
2_2587	K02855	8_2794		0_900
2_2586	K02854	8_2793		0_3752	K02850
2_2585	K03534	8_1507		0_3338
2_2582	K01629	8_1230	K07126	0_3493	K03810
2_2583	K02856	8_2684		0_2993	K01872
2_2580	K00848	8_1764	K00648	0_857	K02759
2_2581	K01813	8_2536		0_2315	K01686
1_3239	K01760	8_1459		0_575
1_3137	K00854	8_633		0_2050
1_3134	K02647	8_837		0_2627
1_3136		8_2848		0_522	K12519
2_3400	K11645	1_1648	K18850	0_932	K06867
1_3139	K00018	2_2783		0_3634
1_3004	K06167	32_579	K22015	0_3631
1_3005		39_3721		0_3633
1_3672	K07507	5_2046	K02012	0_3628
1_1170	K13634	5_2047	K02011	0_3627
1_1166		5_2045	K02010	0_2867	K02013
1_1168		1_813	K06970	0_3632	K00529
1_3085	K01104	2_1091	K12137	0_3636	K00130
1_3080		2_1098	K12144	0_3635
1_1169		1_1000	K22015	0_3637	K01652
1_3084	K02796	1_3563		0_3629
1_1167		1_999	K05796	0_3630
1_3026	K12518	1_997	K04653	0_3664
1_3025	K12519	1_995	K12143	0_1811
1_3020	K12519	1_993	K12141	0_1807
1_3675	K12518	1_992	K12140	0_1810
1_3496	K08323	1_990	K12138	0_1809	K12519
1_3022	K07345	1_994	K12142	0_2991	K07090
1_3018		1_991	K12139	0_1573	K02016
1_3021		1_996	K08315	0_1572	K02014
5_3374	K19092	1_989	K12136	0_506	K03310
5_3792		2_2007		0_863
5_3793		1_2359		0_2998
5_3795	K01488	1_2525		0_2865	K02016
5_672		1_23	K01431	0_2866	K02015
5_3389	K01760	1_25		0_3047	K18305
5_707	K23991	6_1705		0_3393	K12974
5_3392	K01714	6_1365		0_2235
5_2068	K01631	6_1906		0_3798	K01434
5_2072	K01753	6_1458		0_3766
5_2071	K03307	6_3119		0_1823	K06975
5_2070		6_2883		0_1805	K01506
5_2066	K19333	6_798		0_2467
5_2362		6_801	K12543	0_1863	K00121
5_2067	K00883	6_2872		0_1794	K02035
5_668		6_401		0_1796	K02031
5_671		6_3170	K05813	0_1796	K02034
5_673		6_3172	K05815	0_1798
5_710		6_3127	K01182	0_1795	K02033
5_4218		6_375	K10111	0_1797	K02032
5_3394		6_3118	K01759	0_1829	K05799
5_3391		6_3111	K01673	0_1040
5_3388	K03326	6_2557	K02011	0_2506
5_667	K05499	6_2556	K02010	1_1323	K03307
5_4220	K00598	6_2163		1_1041	K03337
10_3288	K11202	6_1022	K08659	0_3598
5_4415	K11206	6_847		0_534	K00373
5_4416		6_802	K12541	0_2584
5_4414	K10218	6_2558	K02012	0_3431	K00010
5_708	K15524	6_850	K07345	0_890	K03490
5_709	K02770	6_2199	K19413	0_3436	K03338
5_705		6_803	K12542	0_253	K01271
5_706	K22110	6_1072	K08476	0_1884	K11209
10_4054		6_1070	K08478	0_252
10_4067		6_1071	K08475	0_858	K02761
5_1372	K06867	1_2733	K12685	0_859	K02760
5_3921		6_373	K02025	0_3686	K01207
10_4207		6_199	K03326	0_856	K01222
5_2042		6_372	K02027	0_3430	K03336
5_1370		24_2997		0_1917
5_1371	K03885	8_3533	K20331	1_3631	K19333
5_1886		8_841	K03830	0_3663	K02083
5_2561	K07090	8_983		0_3600	K09946
5_3321		8_3532		0_898
5_2138		8_1863		0_3626	K14061
5_1885		8_1860	K07345	0_1864	K01070
5_245		8_1859		0_1862	K23239
5_268		8_1862	K07347	0_3428
5_775		8_1861	K07346	0_3437	K03335
5_1016	K03533	8_1866		0_536	K02575
5_1879		8_1864		0_533	K00374
5_3093		8_844	K00064	0_535	K00371
5_2562		8_700		0_1132	K02000
5_1015	K07811	8_848		0_1130	K02002
5_1014	K03532	8_846		0_1131	K02001
5_1012	K11930	8_843		0_1223	K03366
5_1013	K07772	8_2504		0_1060	K00847
5_2738		8_2968		0_3696
5_1877		8_845		0_1423
5_2739		8_869		0_901
5_1011	K07647	8_1142		0_3429	K00140
1_1909		8_1865		0_3625
1_1784		8_3474		0_530	K01239
1_3013	K13409	8_852		0_3435
1_3014		8_3473		2_3405	K00370
1_1911	K07129	8_1167		1_2254
1_2846	K01439	8_2356		1_3698
1_2845		8_2966		2_123
1_2847		8_2758		0_516
1_2164		8_3338		0_498
1_2848		39_3490		0_1349	K07357
1_2158		8_2191		0_1347
1_3010	K09458	8_2212		0_499
1_160	K01250	8_2834		0_1348
1_158	K08173	8_675		0_929	K12243
1_159	K02529	1_2498		0_925
1_1907	K07308			0_928	K16088
1_1908	K07307			0_2383	K04045
1_2132				0_1179
1_2135				0_2498	K03719
1_2134	K00007			0_2844
1_2139				0_2843
1_2142				0_2244
1_2144	K00615			0_3418	K09936
1_2143	K01808			0_3417
1_125	K12266			0_3416	K00852
2_173	K07322			0_3419	K07048
1_1005				0_30
1_560	K07644			0_77
1_564	K07798			3_1483
1_1039	K11183			0_1402
1_3097	K13636			0_3231
1_3098	K13629			0_2165
2_3353	K02525			0_2792	K00703
1_3095				0_2791	K00700
1_3096	K00090			0_1028
1_3094	K00874			0_3424	K00688
1_3498	K00040			0_3425	K00975
1_3015				0_345
1_3008	K02078			0_237
1_3011				0_234
1_191				0_525
1_565	K07787			3_2790
1_944	K02770			0_1888	K23777
1_1155	K00508			0_1921
1_3681	K10914			0_1792
1_1506				0_2650
1_3079	K01685			0_1897
1_1783				0_1975	K07347
1_3099	K01753			0_2033
1_3077				0_2833	K21908
1_563	K07810			0_2756
1_680	K01480			0_2246	K07052
1_678	K21699			0_1874	K10778
5_3900	K01685			0_1893	K03919
10_3550				0_3787
5_2347				0_3012
5_4098	K02800			0_1784	K03671
5_1694	K00009			0_2402
5_1695	K02562			0_3495
10_112	K07350			0_2330
10_105				0_2893
5_2763				0_1064
5_3903				0_2910	K05873
5_4222				0_3914
5_4031	K21395			0_1838
5_2058	K07673			0_1837
5_1000	K01758			0_2679	K02745
5_4030				0_2681	K16371
5_649				0_2676	K08302
5_3996				0_807
5_2051	K00059			0_1452
5_2049	K01897			0_3487
5_2055	K02647			0_2037
5_2050	K01026			0_2715	K01972
5_2052	K00626			0_1608
5_6	K06978			0_760
5_4029				0_1175
5_998	K01760			0_3733	K02847
5_3902	K22397			0_3731
5_1376	K22024			0_1323
5_1375	K22129			0_3804	K02014
5_1374	K02526			0_3803	K23446
5_9	K22230			4_3244	K02016
5_8	K19333			0_3852
5_1515	K03188			0_3806	K01697
5_1516	K03187			0_23
5_1518	K01429			0_1	K11903
5_1517	K01428			0_2288	K11907
5_1519	K01430			0_2284	K11891
5_1514	K03189			0_2283	K11911
5_1522				0_2285	K11910
5_1520	K03190			0_2292	K11894
5_251				0_2291	K11906
5_4	K16091			0_2287
5_157	K02028			0_2281	K11896
5_3673	K18997			0_2286	K11909
5_158	K02029			0_2290	K11893
5_159	K02030			0_2297	K11901
				0_2296	K11900
				0_2293	K11895
				0_2294	K11896
				0_2295	K11905
				0_55
				0_29
				0_54
				0_2380	K06147
				3_2613	K06147
				3_773	K01183
				3_2791	K00799
				0_1977
				3_1608
				3_1595
				0_1850
				0_3604
				0_3757
				0_926
				0_927
				0_2652
				0_2499
				0_3
				0_2527
				0_1038	K19047
				0_915	K00694
				0_3032
				0_2651
				4_500
				0_1551
				0_1576
				0_2079	K07054
				0_1830	K02625
				0_2788
				0_1880	K19577
				0_512	K05351
				0_513	K09988
				0_1997
				0_3377
				0_3571
				0_1039	K05804
				0_1466	K14587
				0_1415	K00799
				0_1049	K12373
				0_1412	K20609
				0_1411	K02774
				0_1409	K06971
				0_1408	K02821
				0_1410	K02775
				0_1407
				0_1828
				0_218
				0_219
				0_216
				0_2002
				0_2003
				0_2302	K19777
				0_2298	K01178
				0_3643
				0_1498	K05879
				0_1497	K05878
				0_3179	K16053
				0_2049	K11645
				0_3952	K18697
				0_3949	K05794
				0_640	K03485
				0_3519	K00208
				0_3930
				0_3438
				0_1274	K18009
				0_1273
				0_2239	K09474
				0_2796	K02747
				0_2677	K02744
				0_2678	K02746
				0_2448
				0_2875
				0_638
				0_636
				0_3479
				0_365
				0_351
				0_1774
				0_1042
				0_2786	K15540
				0_2787	K07347
				0_364
				0_3482
				0_1706
				0_1909	K10680
				0_3497	K17210
				0_3657	K17208
				0_3496	K17209
				0_1705	K16087
				0_2318	K07784
				0_1913	K07346
				0_1912	K07352
				0_354
				0_3237	K08989
				0_2319	K01092
				0_3030
				0_3028
				0_918
				0_1550
				0_1499
				0_3459	K01183
				0_2303
				0_1017	K00297
				0_2500
				0_1016	K01447
				0_2655
				0_2317
				0_574	K18815
				0_2625	K23997
				0_1845	K06950
				0_2569
				0_2314
				0_3649
				0_1092
				0_3647
				0_924	K16087
				0_3652	K01183
				0_2507	K12373
				0_3239
				0_917	K20543
				0_3395
				0_235
				0_3238
				0_1868	K00657
				0_3031
				0_212
				0_3313
				0_2872
				0_3793
				0_3792	K11034
				0_3748	K02016
				0_1447	K22112
				0_1446	K01426
				0_1271
				0_1270
				0_508	K17205
				0_1269
				0_1151
				0_374	K06872
				0_413
				0_3380	K07346
				0_3378
				0_3375
				0_2819	K01179
				0_1892
				0_2389
				0_1954
				0_2364
				0_2365
				0_2012
				0_2339
				0_1886
				0_3968
				0_3613	K23944
				0_3358	K00648
				0_3382
				0_213
				0_3357	K07076
				0_2073
				0_2335	K22488
				0_2838
				0_1905
				0_663
				0_1454
				0_1907	K00984
				0_1781	K07052
				3_650
				0_3433	K07182
				0_3755
				0_3758	K03710
				0_3756	K03457
				0_2839	K07274
				0_3296
				0_3432	K03307
				0_3321	K01894
				0_1041	K07404
				0_2685	K00059
				0_511	K00854
				0_514	K02529
				0_510	K17207
				0_509	K17206
				0_2014	K07345
				0_2801	K17733
				0_2800
				3_1793	K00265
				0_3312	K07347
				0_2795	K02079
				0_639	K02819
				0_1577
				0_1579	K06940
				0_1578
				0_2080
				0_2680	K02082
				0_1899
				0_1996
				0_2721
				0_637	K01838
				0_950
				0_1055
				0_1174
				0_3583
				0_2036
				0_1056	K05881
				0_2337	K22487
				0_3500
				0_2706
				0_3862	K09914
				0_3427
				0_617
				0_1725
				0_840
				0_1011	K03324
				0_1877	K10914
				0_1875	K01251
				0_3509
				0_1876	K03317
				0_1908	K16137
				0_1611
				0_2914	K15554
				0_2916	K04091
				0_2954	K15553
				0_2913	K00299
				0_2905
				0_375	K03744
				0_287
				0_2404
				0_2024	K19271
				0_1895
				0_921	K04761
				0_914
				0_920	K00963
				0_1078
				0_2687
				0_3434	K02342
				0_3310	K07345
				0_3033
				0_3311
				0_1775	K07454
				0_919
				0_2903
				0_1070
				0_2754
				0_3188
				0_2023
				0_1428
				0_3391
				0_2382
				0_2818
				0_2808
				0_221
				0_263
				0_233
				0_3392
				0_3740
				0_2784
				0_2238
				0_936
				0_1679
				0_3162
				0_1824	K13085
				0_3000	K03654
				0_2425
				0_1783	K03112
				0_1047
				0_2615	K07126
				0_503
				0_3314
				0_3915
				0_3150
				0_515
				0_3790
				0_3498
				0_3980
				0_2765
				0_2821
				0_2915	K15555
				0_949
				0_3802	K01644
				0_1168	K22579
				0_3805	K01586
				0_3808
				0_3807
				0_3473	K09975
				0_1241
				0_2661
				0_1071
				0_3639	K03832
				0_1172
				0_1247
				0_1222
				0_3027
				0_3016
				0_3469
				0_3029
				0_3307
				0_14
				0_3308
				0_3644
				0_2857
				0_916	K20541
				0_3650
				0_3651
				0_3648
				0_1230
				0_3092
				0_1124
				0_1170
				0_1169
				0_1171
				0_3641	K07280
				0_817
				0_2528
				0_2671
				0_2619
				0_1841
				0_1113
				0_500
				0_214
				0_3282
				0_1477
				0_518
				0_892
				0_2816
				0_1005
				0_2445
				0_382
				0_1966
				0_2462
				0_582	K24175
				0_1898
				0_3907	K00156
				0_2999
				0_3042
				0_3658
				0_3950	K05795
				0_3969
				0_3951	K05795
				0_3948	K05793
				0_3947	K05792
				0_3946	K05791
				0_3945
				0_3944
				0_3943
				0_3942
				0_3941
				0_3940
				0_3938
				0_3936
				0_3935
				0_3334
				0_3315
				0_3055
				0_2817
				0_2413
				0_2015
				0_1786
				0_1777
				0_505	K06872
				0_288	K07126
				0_3934
				0_1776	K01434
				0_1420
				0_1890
				0_583
				0_1048	K07126
				0_217
				0_2802
				0_2829
				0_3937
				0_2329
				0_2437	K07308
				0_2342
				0_1720
				0_3038
				0_2340
				0_1463	K03487
				0_2081
				0_2461
				0_1462	K02753
				0_2804
				0_215
				0_2897
				0_2899	K01434
				0_2898	K04069
				0_2901
				0_2902
				0_2900	K00091
				0_1115
				0_1125
				0_3394
				0_2659	K07090
				0_2660
				0_3263	K01119
				0_1324
				0_507
				0_3273
				0_1866
				0_1413
				0_1785
				0_243
				0_564
				0_2414
				0_245	K07346
				0_244	K07347
				0_1878
				0_1903
				0_1901
				0_1900
				0_1902
				0_2807
				0_2810
				0_2811
				0_2806
				0_2805
				0_2813
				0_2814
				0_2812
				0_2809
				0_3642
				0_1114
				0_1537
				0_1461	K01223
				0_1825
				0_3261	K11537
				0_2236
				0_502
				0_2374	K00059
				0_2375	K10530
				0_2376
				0_934
				0_1822
				0_2856
				0_2763
				0_1434	K08970
				0_2388
				0_2031
				0_2438	K23349
				0_2841
				0_1793
				0_855	K03478
				0_1433
				0_3584
				0_1935
				0_1857
				0_1804
				0_2834	K00824
				0_3785
				0_3665
				0_3666	K06989
				0_1013
				0_2682	K02081
				0_1450
				0_3786
				0_3011	K05602
				0_3580
				0_257
				0_1033
				0_1035
				0_1034
				0_523
				0_524
				0_540	K12518
				0_519
				0_1018
				0_1882
				0_1883
				0_2579
				0_2728	K14057
				0_2729	K12940
				0_2730	K12941
				0_3345
				0_3270
				0_3271	K19594
				0_3275
				0_3269
				0_3272	K19595
				0_3267	K07213
				0_3274
				0_2505
				0_2418
				0_1453
				0_2046
				0_1427	K01130
				0_2344	K03543
				0_1511	K08194
				0_1513
				0_1512	K18983
				0_1510
				0_2658	K03710
				0_2520
				0_3260	K02529
				0_3262	K01251
				0_3638
				0_3304	K07345
				0_381
				0_3560
				0_1341
				0_1340	K00389
				0_520
				0_521
				0_2699
				0_1852	K01489
				0_1465	K17840
				0_1867	K22441
				0_2343	K03446
				0_3037
				0_3906
				0_2183
				0_1426	K24118
				0_3256	K00657
				0_3774

## Sheet: Statistics
	Providencia stuartii	Providencia rettgeri	Providencia alcalifaciens
Enzymes	116	60	25
Protein kinases	0	3	1
Protein phosphatases and associated proteins	1	0	0
Peptidases and inhibitors	8	1	2
Glycosyltransferases	2	0	0
Lipopolysaccharide biosynthesis proteins	3	0	0
Peptidoglycan biosynthesis and degradation proteins	1	0	0
Lipid biosynthesis proteins	3	4	1
Amino acid related enzymes	3	0	0
Transcription factors	19	13	1
Ribosome biogenesis	0	0	2
Transfer RNA biogenesis	2	0	0
Chaperones and folding catalysts	6	1	1
DNA replication proteins	2	0	0
Chromosome and associated proteins	2	1	0
DNA repair and recombination proteins	5	0	0
Mitochondrial biogenesis	0	0	0
Transporters	61	26	14
Secretion system	21	5	7
Bacterial toxins	1	0	0
Two-component system	0	4	2
Bacterial motility proteins	5	2	3
Exosome	2	3	0
Prokaryotic defense system	0	1	0
Antimicrobial resistance genes	6	1	0
